# Supplementary material
Source: Copernicus journal article supplement (doi:10.5194/tc-20-2053-2026)
Supplement: Supplementary file 1 [file tc-20-2053-2026-supplement.pdf]

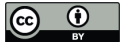

*Supplement of*

## **Results of the second Ice Shelf–Ocean Model Intercomparison Project (ISOMIP+)**

**Claire K. Yung et al.**

*Correspondence to:* Claire K. Yung ([claire.yung@anu.edu.au](mailto:claire.yung@anu.edu.au))

The copyright of individual parts of the supplement might differ from the article licence.

## S1 Supplementary Figures

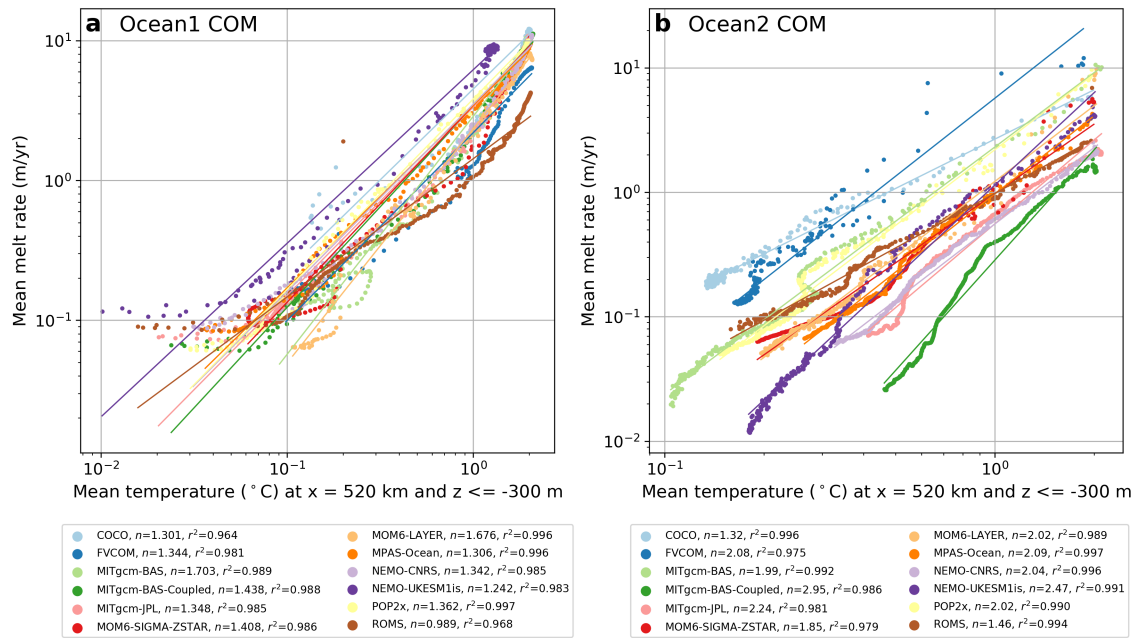

**Figure S1.** Mean melt rates as a function of ocean temperature (shifted by  $+2.1^{\circ}\text{C}$ ) at depth, near the ice front. The log-log plot is used to fit  $m = T^n$ , where  $n$  is power law exponent with  $m$  the mean melt rate and  $T$  the temperature below 300 m at the  $x = 520$  km transect.  $r^2$  is the associated Pearson correlation coefficient. Panel a shows Ocean1 COM and b shows Ocean2 COM. Pearson correlation coefficients are high, with power-law exponents averaging 1.3 for Ocean1 and 2 for Ocean2.

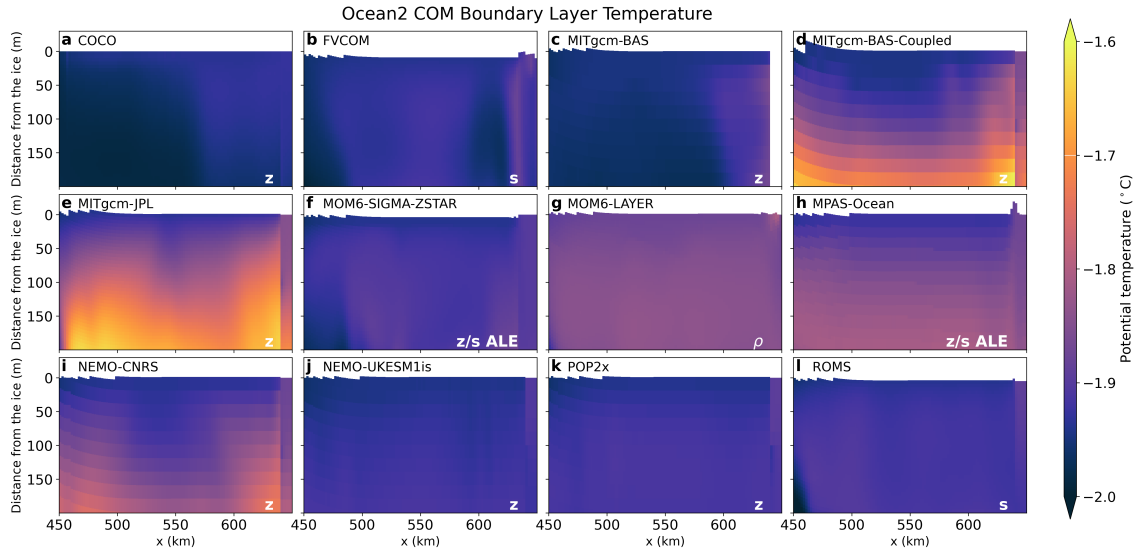

**Figure S2.** Boundary Layer Temperature, Ocean2 COM, averaged over year 20 as in Fig. 14.

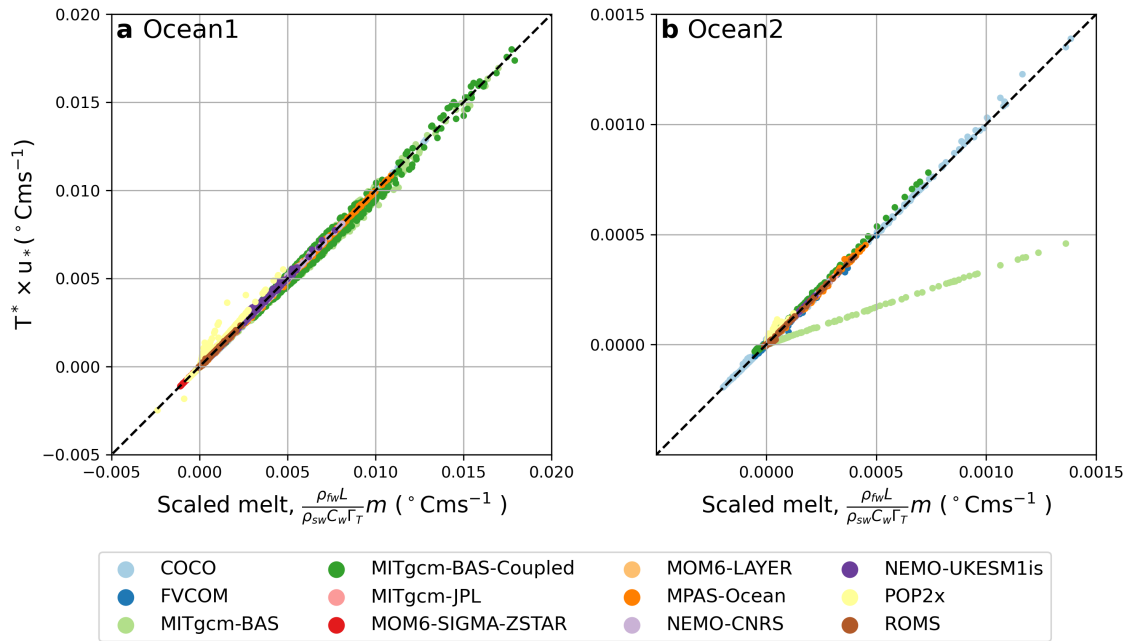

**Figure S3.** Thermal driving multiplied by friction velocity, averaged over year 20 for each model, against melt rate scaled by constants in Eqn. 3 (Table 1 and 2). Panel a shows Ocean1 COM results and Panel b shows Ocean2 COM. For MITgcm-BAS, the Ocean1 value (0.011) in Table 2 is used in both panels. For MITgcm-BAS-Coupled, the inferred value (0.0135) is used rather than the initially reported value.

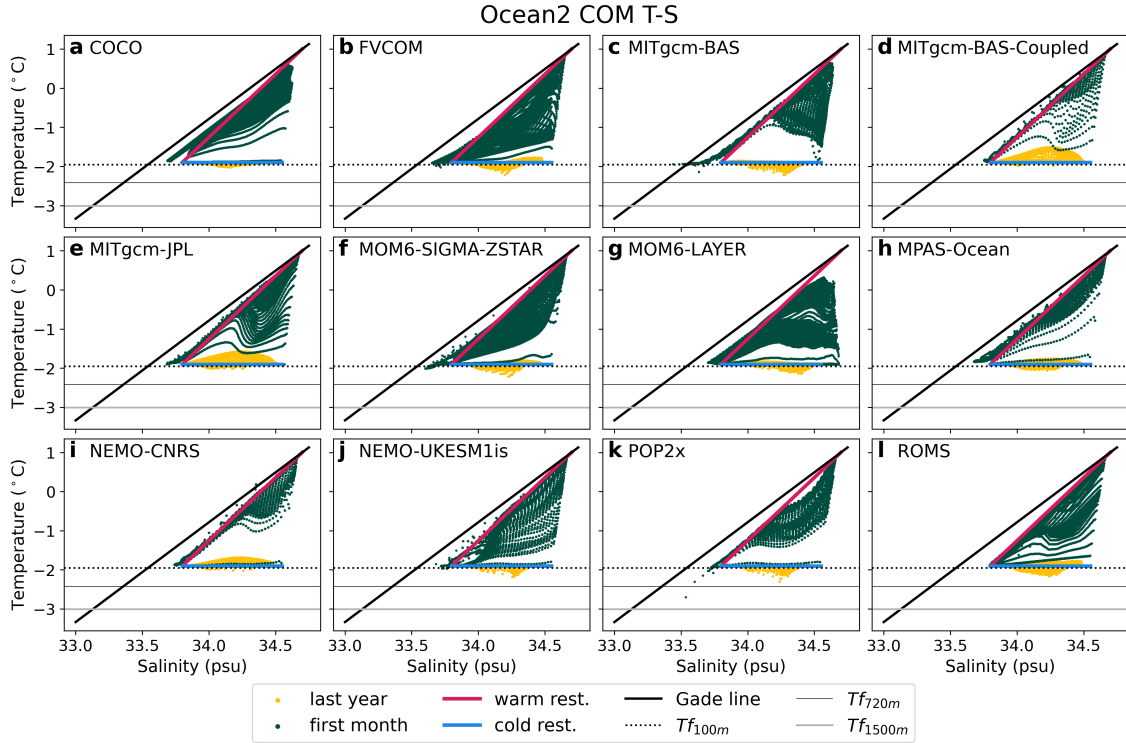

**Figure S4.** Temperature-Salinity space verification for Ocean2 COM, as in Fig. 15.

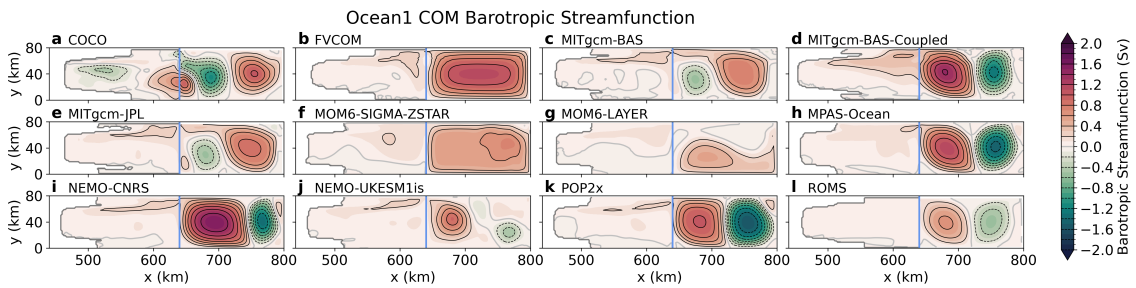

**Figure S5.** Ocean1 COM barotropic streamfunction averaged over year 20, corresponding to the steady warm state of the cavity, for the full domain.

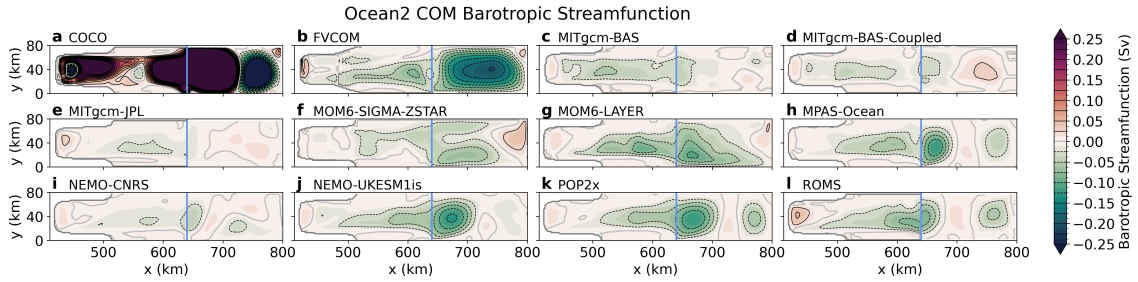

**Figure S6.** Ocean 2 COM barotropic streamfunction averaged over year 20, corresponding to the steady cold state of the cavity, for the full domain.

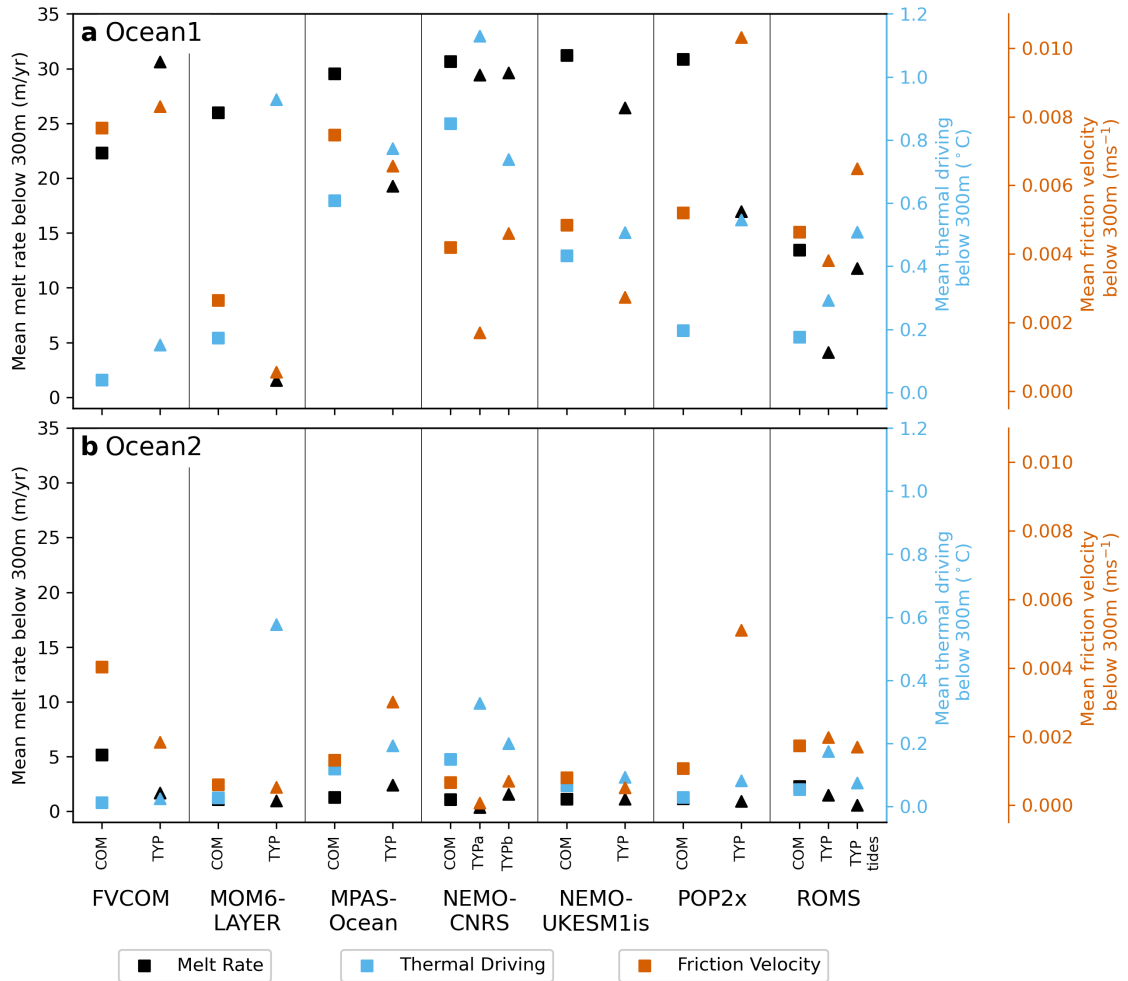

**Figure S7.** Area-averaged and temporally averaged (over year 20) melt rate ice depths below 300 m (black), thermal driving (blue) and friction velocity (orange) for each model with both a COM (squares) and TYP submission (triangles).

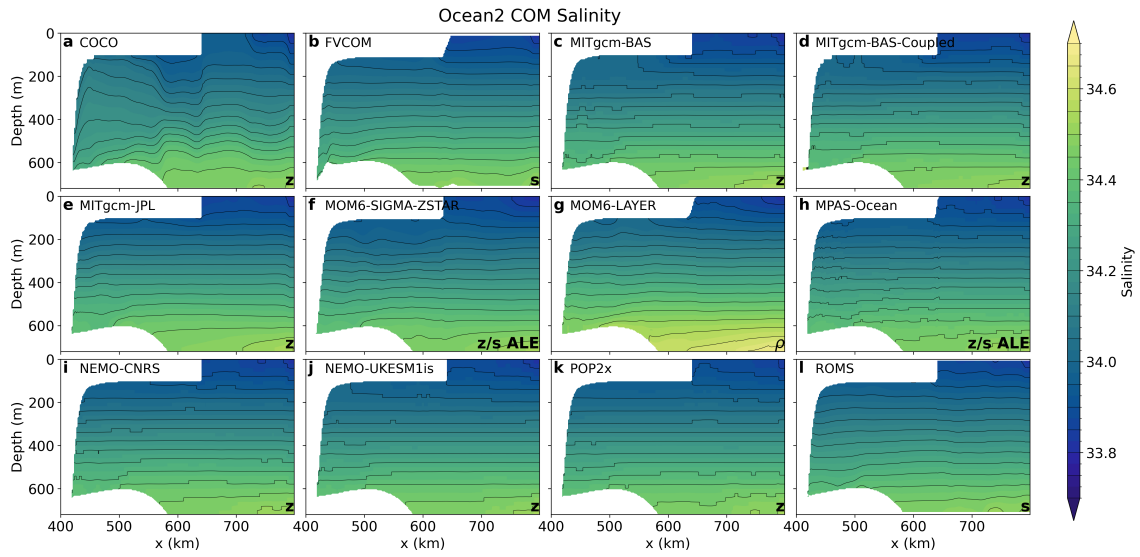

**Figure S8.** Salinity transect for Ocean2 COM through  $y = 40$  km, averaged over year 20.

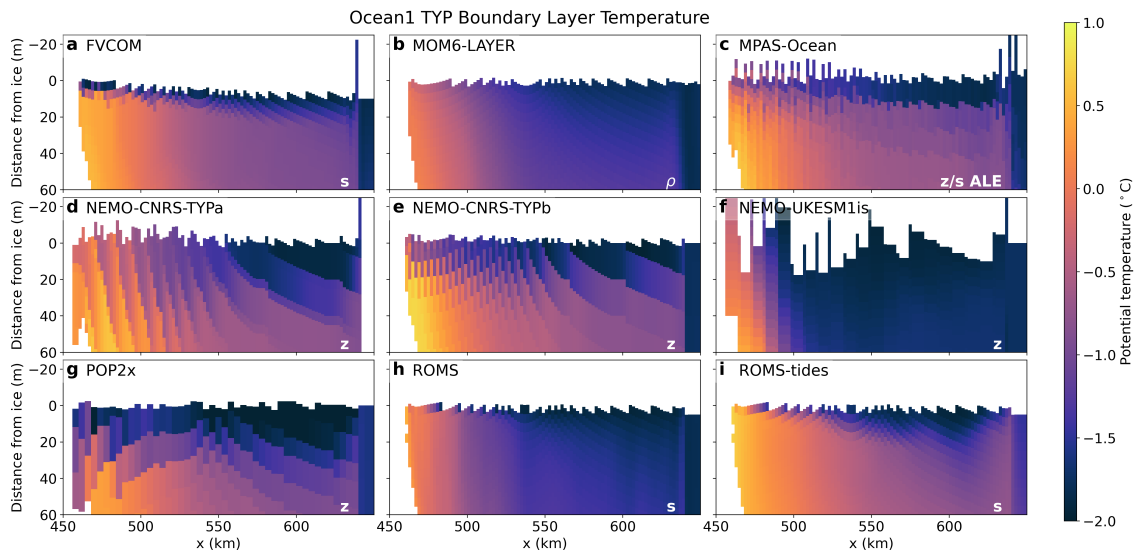

**Figure S9.** Boundary layer temperature, for Ocean1 TYP, averaged over year 20 as in Fig. 14.

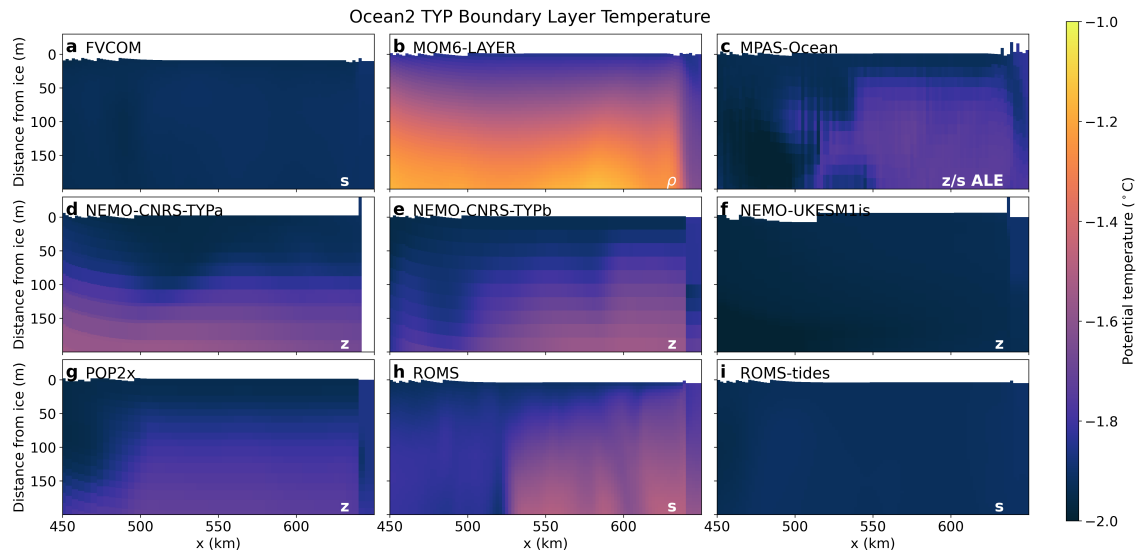

**Figure S10.** Boundary layer temperature, for Ocean2 TYP, averaged over year 20 as in Fig. 14.

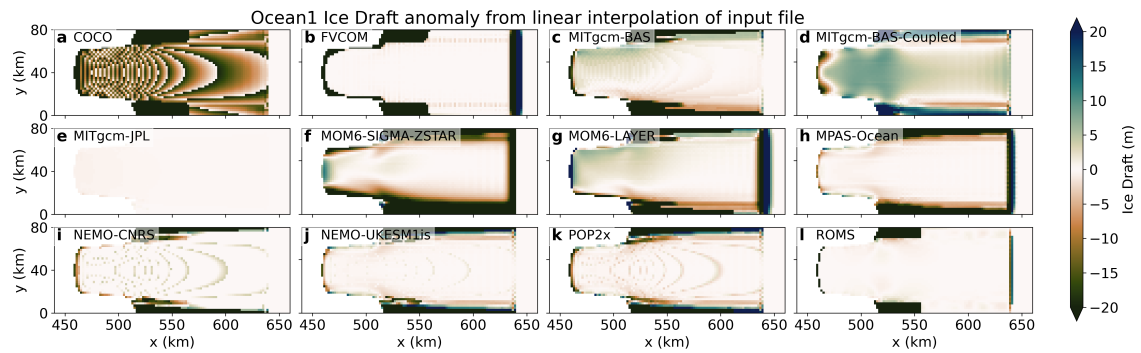

**Figure S11.** Ocean1 ice draft (position of ice-ocean interface) anomaly from linear interpolation of provided input file. Positive values have a thicker ice draft.

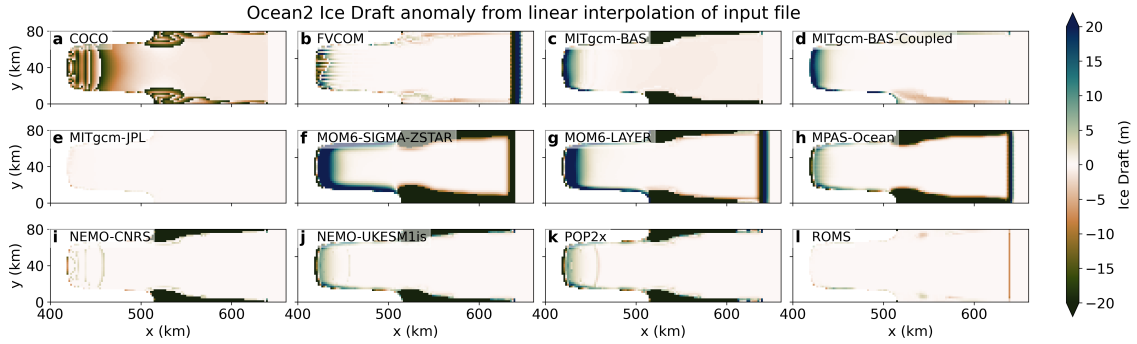

**Figure S12.** Ocean2 ice draft (position of ice-ocean interface) anomaly from linear interpolation of provided input file. Positive values have a thicker ice draft.

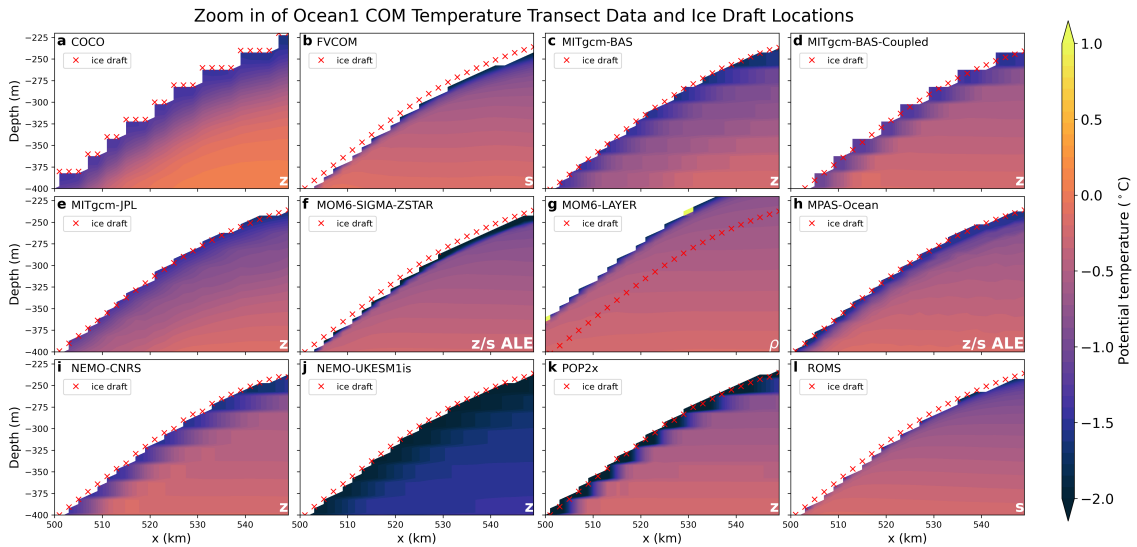

**Figure S13.** Temperature along the  $y = 40$  km transect at year 20, zoomed into the region  $x = 500$ - $550$  km, to demonstrate the ‘distance from the ice’ plotting of Fig. 14. Red crosses indicate the ice draft output and colours indicate the temperature data output, which is in 5 m depth discretisation. Modelling groups remapped their data from the model’s native grid to the native grid in different ways. Sea level rise is seen in MOM6-LAYER as the ice draft is from time zero; a correction is employed in Fig. 14 to shift the ice draft to the appropriate depth.

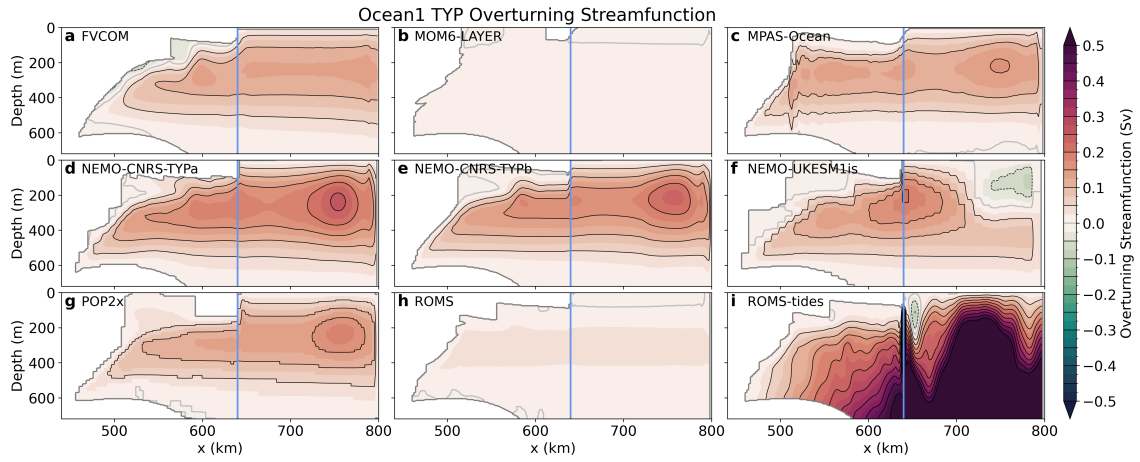

**Figure S14.** Overturning streamfunction averaged over year 20 of the Ocean1 TYP experiment.

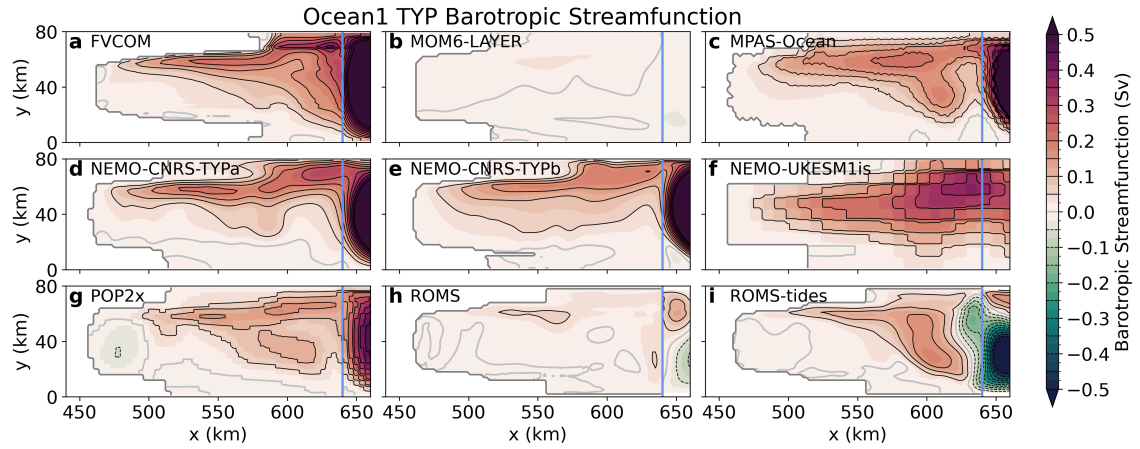

**Figure S15.** Barotropic streamfunction averaged over year 20 of the Ocean1 TYP experiment, focusing on the ice shelf cavity.
